# Supplementary material for: Energy-adaptive resistive switching with controllable thresholds in insulator–metal transition
Source: Royal Society of Chemistry journal article supplement (doi:10.1039/d2ra06866d), 2022-01-01
Supplement: d2ra06866d1.pdf [file d2ra06866d1.pdf]

## Supporting information

### Energy-adaptive resistive switching with controllable thresholds in insulator-metal transition

Tiantian Huang,<sup>§</sup> Rui Zhang,<sup>§</sup> Lepeng Zhang, Peiran Xu, Yunkai Shao, Wanli  
Yang, Zhimin Chen, Xin Chen,\* Ning Dai

Tiantian Huang, Rui Zhang, Peiran Xu, Wanli Yang, Prof. Xin Chen, Prof.  
Ning Dai

State Key Laboratory of Infrared Physics, Shanghai Institute of Technical  
Physics, Chinese Academy of Sciences  
Shanghai 200083, China

Email: xinchen@mail.sitp.ac.cn, wdhu@mail.sitp.ac.cn

Yunkai Shao, Prof. Xin Chen, Prof. Ning Dai

Hangzhou Institute for Advanced Study, University of Chinese Academy of  
Sciences

Hangzhou 310024, China

Lepeng Zhang, Prof. Zhimin Chen

College of Materials Science and Engineering, Zhengzhou University  
Zhengzhou 450052, China

Tiantian Huang, Rui Zhang, Prof. Xin Chen, Prof. Ning Dai

University of Chinese Academy of Sciences

Beijing, 100049, China

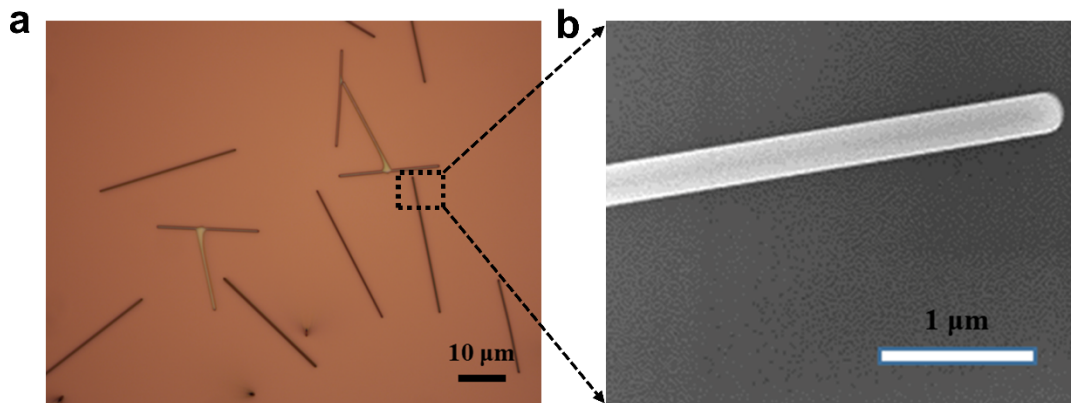

**Figure S1** a) Optical microscopy photograph and b) SEM image of the deposited VO<sub>2</sub> nanowires.

Amorphous SiO<sub>2</sub> was chosen as the substrate to reduce the influence of lattice mismatch during deposition process. The optical microscopy photographs clearly revealed the random distribution directions of the grown VO<sub>2</sub> nanowires. The length was in the range of 30~60 μm and the width was around 200~500 nm.

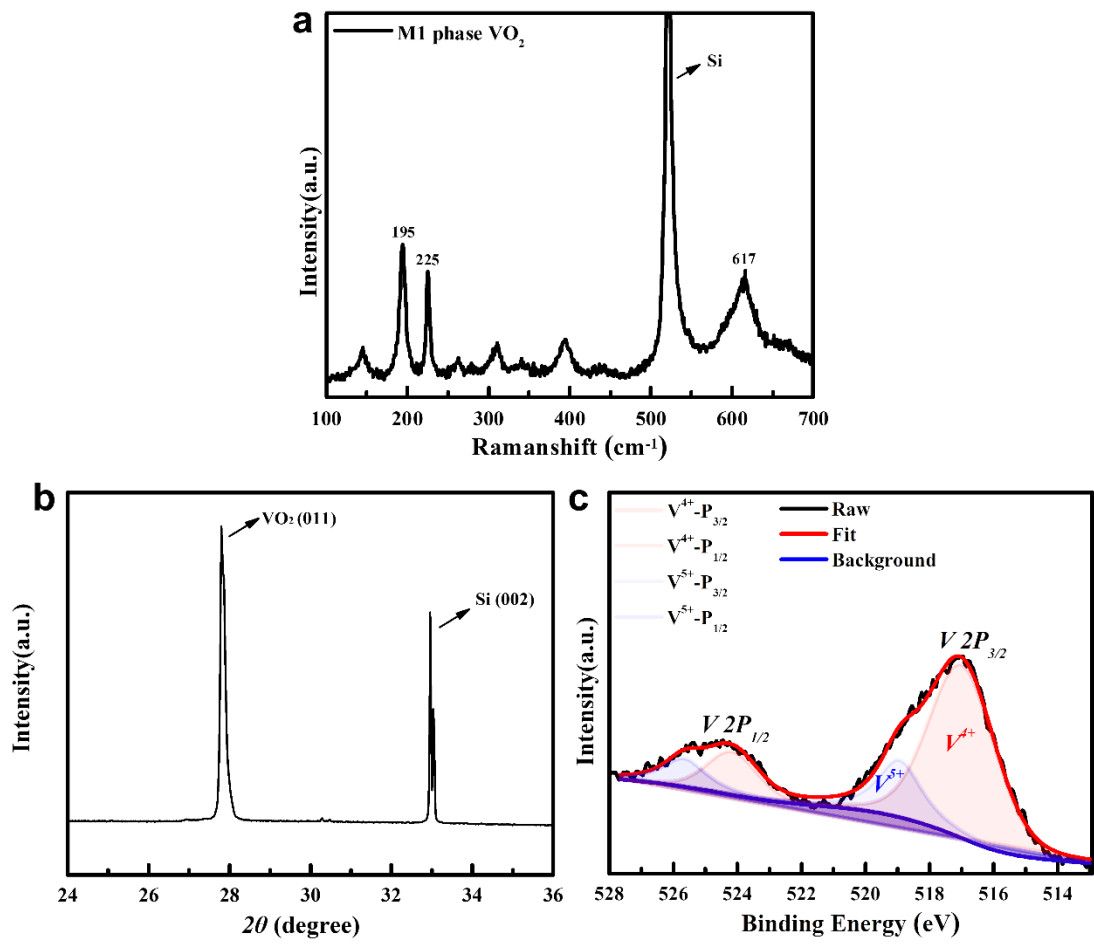

**Figure S2.** a) Raman spectrum of the selected VO<sub>2</sub> nanowire. b) XRD pattern and c) XPS spectrum of the VO<sub>2</sub> nanowires.

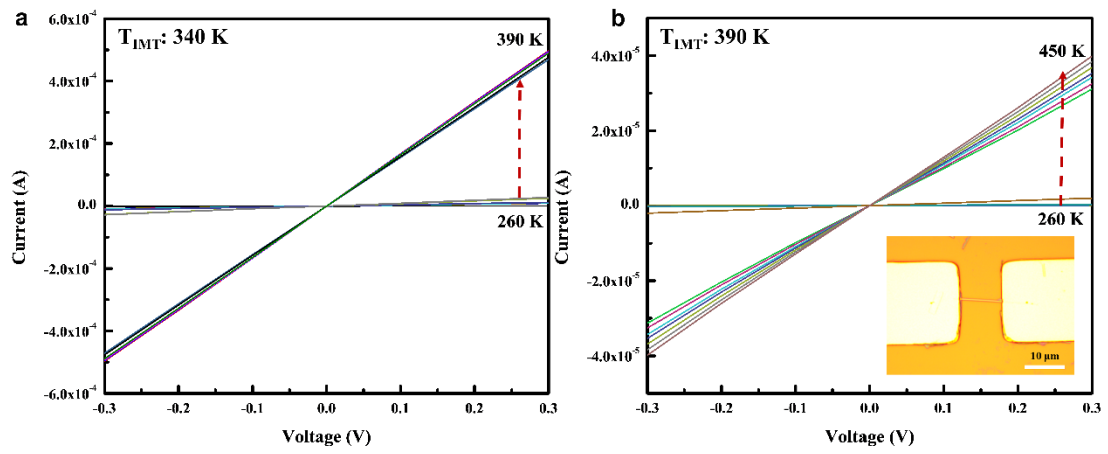

**Figure S3** I-V curves based on VO<sub>2</sub> nanowire with the transition temperature ( $T_{\text{IMT}}$ ) a) 340 K and b) 390 K at different temperatures.
